# Supplementary material for: Resveratrol improves motor function in patients with muscular dystrophies: an open-label, single-arm, phase IIa study
Source: PubMed Central journal article supplement (PMC7688653; doi:10.1038/s41598-020-77197-6), 2020-11-25
Supplement: 41598_2020_77197_MOESM1_ESM.pdf [file 41598_2020_77197_MOESM1_ESM.pdf]

Supplementary information

**Resveratrol improves motor function in patients with muscular dystrophies: An open-label, single-arm phase IIa study**

Kentaro Kawamura<sup>1</sup>, Shinobu Fukumura<sup>1</sup>, Koki Nikaido<sup>1</sup>, Nobutada Tachi<sup>2</sup>, Naoki

Kozuka<sup>3</sup>, Tsugumi Seino<sup>3</sup>, Kingya Hatakeyama<sup>1</sup>, Mitsuru Mori<sup>2</sup>, Yoichi M. Ito<sup>4</sup>,

Akiyoshi Takami<sup>5</sup>, Shiro Hinotsu<sup>6</sup>, Atsushi Kuno<sup>7</sup>, Yukihiro Kawasaki<sup>1</sup>, Yoshiyuki

Horio<sup>7\*</sup>, Hiroyuki Tsutsumi<sup>1\*</sup>

<sup>1</sup>Departments of Pediatrics, Sapporo Medical University School of Medicine, Sapporo 060-8543, Japan.

<sup>2</sup>Faculty of Health Science, Hokkaido Chitose College of Rehabilitation, Chitose 066-0055, Japan.

<sup>3</sup>Department of Physical Therapy, Sapporo Medical University School of Health Sciences, Sapporo 060-8556, Japan.

<sup>4</sup>Research Center for Medical and Health Data Science, The Institute of Statistical Mathematics, Tachikawa 190-8562, Japan.

<sup>5</sup>Division of Hematology, Department of Internal Medicine, Aichi Medical University School of Medicine, Nagakute 480-1195, Japan.

<sup>6</sup>Department of Biostatistics, Sapporo Medical University School of Medicine, Sapporo  
060-8556, Japan.

<sup>7</sup>Department of Pharmacology, Sapporo Medical University School of Medicine,  
Sapporo 060-8556, Japan.

## Supplementary Figure S1

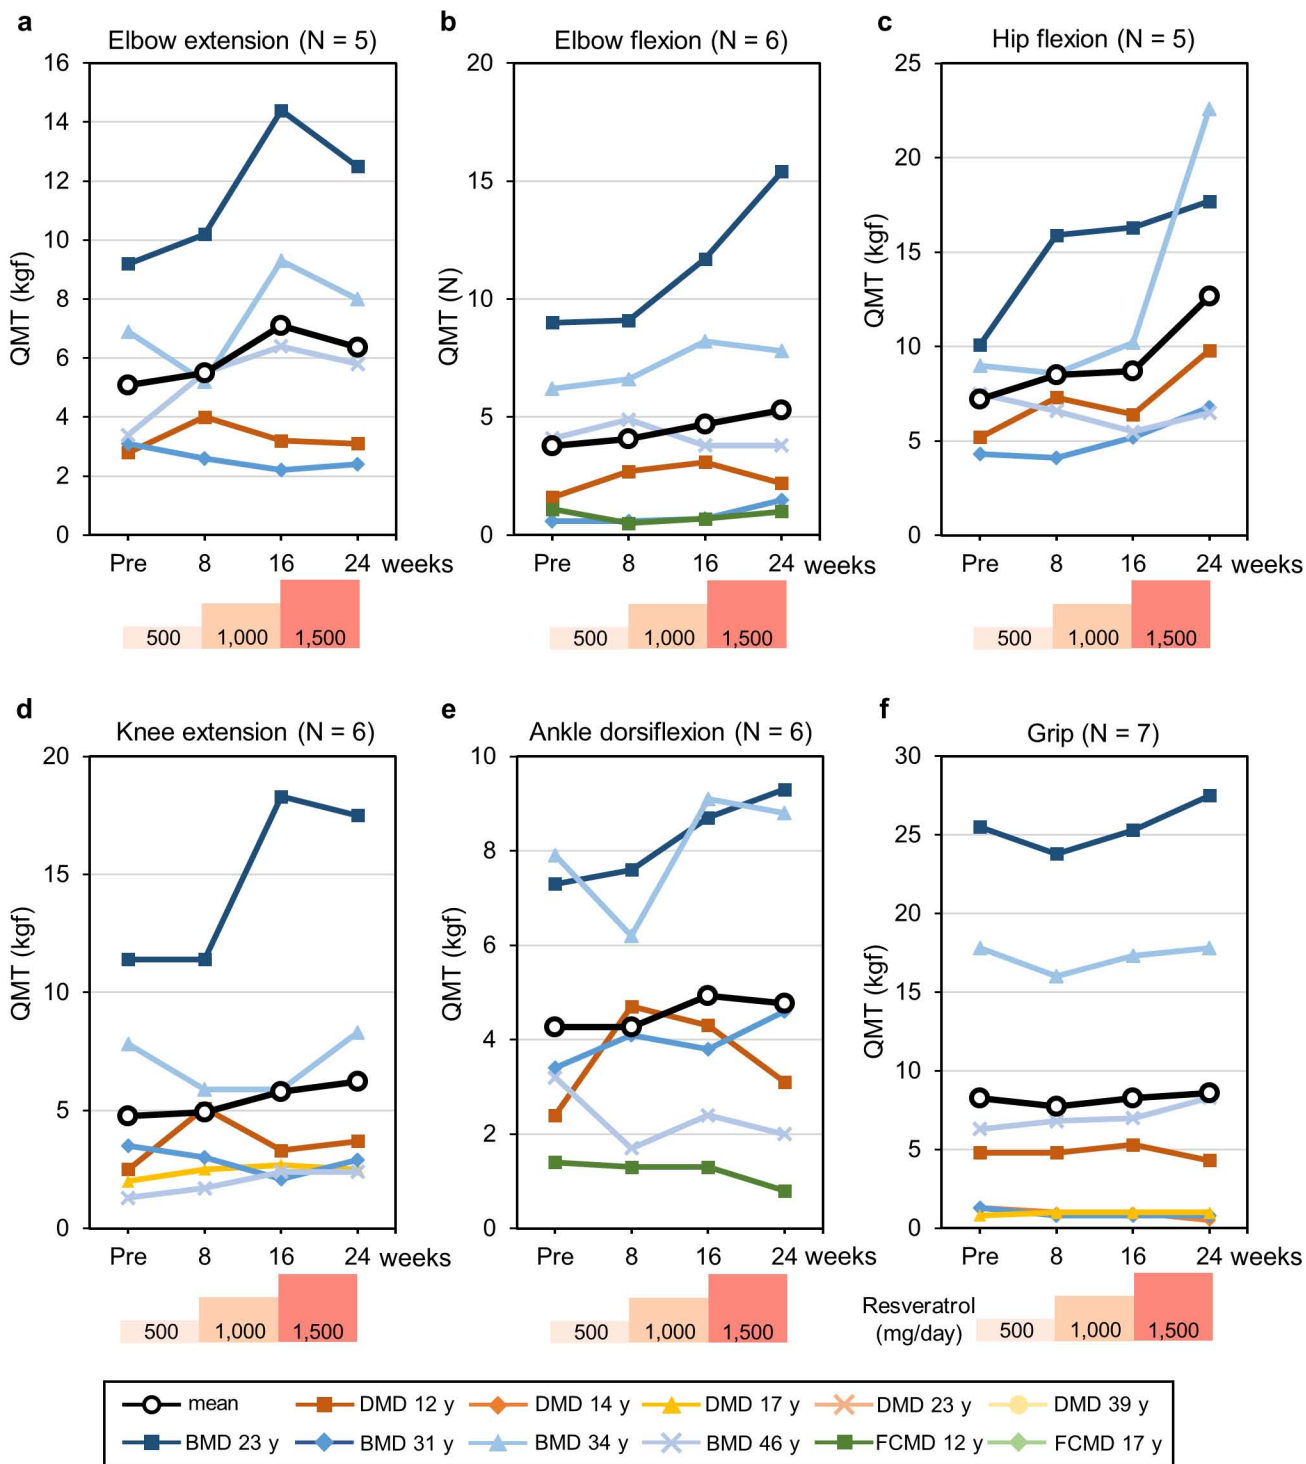

Muscle strength following resveratrol administration. **(a-f)** Time-course of muscle strength for (a) elbow extension (N = 5), (b) elbow flexion (N = 6), (c) hip flexion (N = 5), (d) knee extension (N = 6), (e) ankle dorsiflexion (N = 6) and (f) grip (N = 7) measured by QMT.

**Supplementary Table S1. Blood tests, echocardiographic parameters and pulmonary function in each patient.**

| <b>DMD 12 y</b>           |      |      |      |      |       |      |      |
|---------------------------|------|------|------|------|-------|------|------|
| Weeks                     | Pre  | 4    | 8    | 12   | 16    | 20   | 24   |
| WBC, ×10 <sup>3</sup> /μl | 6400 | 8900 | 6700 | 8100 | 7300  | 6500 | 6800 |
| Hb, mg/dl                 | 14.1 | 13.3 | 13.3 | 14.3 | 13.8  | 13.2 | 13.1 |
| Plt, ×10 <sup>3</sup> /μl | 396  | 368  | 348  | 357  | 384   | 365  | 374  |
| CK, unit/l                | 9518 | 5850 | 5161 | 7130 | 10247 | 4459 | 5167 |
| AST, unit/l               | 141  | 95   | 77   | 104  | 145   | 66   | 84   |
| ALT, unit/l               | 242  | 156  | 142  | 179  | 225   | 128  | 150  |
| LDH, unit/l               | 702  | 533  | 457  | 608  | 712   | 444  | 488  |
| γ-GTP, mg/dl              | 16   | 13   | 13   | 18   | 17    | 14   | 20   |
| T.Bil, mg/dl              | 0.4  | 0.6  | 0.5  | 0.5  | 0.4   | 0.5  | 0.4  |
| D.Bil, mg/dl              | 0.1  | 0.1  | 0.1  | 0.1  | 0.1   | 0.1  | 0.1  |
| BUN, mg/dl                | 8    | 9    | 10   | 11   | 8     | 7    | 9    |
| Cre, mg/dl                | 0.15 | 0.14 | 0.13 | 0.13 | 0.12  | 0.13 | 0.15 |
| Cys-C, mg/l               | 0.72 |      | 0.83 |      | 0.59  |      | 0.78 |
| TG, mg/dl                 | 8    | 150  | 117  | 206  | 177   | 195  | 204  |
| T.Cho, mg/dl              | 208  | 178  | 190  | 201  | 203   | 171  | 205  |
| Na, mEq/l                 | 143  | 142  | 140  | 141  | 141   | 141  | 141  |
| K, mEq/l                  | 4.5  | 3.8  | 3.7  | 4.4  | 4.2   | 3.6  | 4.1  |
| Cl, mEq/l                 | 104  | 106  | 105  | 104  | 103   | 104  | 105  |
| BNP, pg/ml                | 15.8 | 10.1 | 9.9  | 12.6 | 15.8  | 15.1 | 23.4 |
| EF, %                     | 73.0 |      |      |      |       |      | 60.5 |
| %FS, %                    | 35.4 |      |      |      |       |      | 26.8 |
| LVDd, mm                  | 41.8 |      |      |      |       |      | 38.2 |
| VC, ml                    | 1780 |      |      |      |       |      | 1680 |
| %VC, %                    | 86.8 |      |      |      |       |      | 82.0 |
| PCF, l/min                | 275  |      |      |      |       |      | 240  |

ALT, Alanine aminotransferase; AST, Aspartate aminotransferase; BNP, Brain natriuretic peptide; BUN, Blood urea nitrogen; CK, Creatine kinase; Cl, Chlorine; Cre, Creatinine; Cys-C, Cystatin-C; D.Bil, Direct bilirubin; EF, Ejection fraction; %FS, %Fractional shortening; γ-GTP, γ-glutamyl transpeptidase; Hb, Haemoglobin; K, Potassium; LDH, Lactate dehydrogenase; LVDd, Left ventricular end-diastolic diameter; Na, Sodium; PCF, Peak cough flow; Plt, Platelet; T.Bil, Total bilirubin; T.Cho Total cholesterol; TG, Triglycerides; VC, Vital capacity; WBC, White blood cell.

| <b>DMD 14 y</b>           |      |      |      |      |      |      |      |
|---------------------------|------|------|------|------|------|------|------|
| Week                      | Pre  | 4    | 8    | 12   | 16   | 20   | 24   |
| WBC, ×10 <sup>3</sup> /μl | 3400 | 3900 | 3700 | 3500 | 3800 | 3300 | 3100 |
| Hb, mg/dl                 | 14.1 | 14   | 13.9 | 13.3 | 13.8 | 13.4 | 14   |
| Plt, ×10 <sup>3</sup> /μl | 225  | 249  | 246  | 269  | 261  | 230  | 237  |
| CK, unit/l                | 1250 | 1692 | 1982 | 1285 | 1744 | 1975 | 1739 |
| AST, unit/l               | 32   | 38   | 38   | 33   | 42   | 43   | 41   |
| ALT, unit/l               | 27   | 34   | 30   | 28   | 35   | 34   | 33   |

|              |      |      |      |      |      |      |      |
|--------------|------|------|------|------|------|------|------|
| LDH, U/l     | 231  | 268  | 246  | 245  | 279  | 276  | 285  |
| γ-GTP, mg/dl | 9    | 10   | 10   | 9    | 10   | 9    | 11   |
| T.Bil, mg/dl | 0.8  | 0.7  | 0.8  | 0.7  | 0.4  | 0.5  | 0.7  |
| D.Bil, mg/dl | 0.2  | 0.2  | 0.2  | 0.2  | 0.1  | 0.1  | 0.2  |
| BUN, mg/dl   | 6    | 8    | 7    | 7    | 7    | 6    | 7    |
| Cre, mg/dl   | 0.06 | 0.07 | 0.15 | 0.05 | 0.05 | 0.06 | 0.06 |
| Cys-C, mg/l  | 0.62 |      | 0.64 |      | 0.65 |      | 0.63 |
| TG, mg/dl    | 41   | 61   | 70   | 68   | 105  | 80   | 83   |
| T.Cho, mg/dl | 171  | 187  | 181  | 185  | 187  | 175  | 181  |
| Na, mEq/l    | 138  | 139  | 140  | 138  | 139  | 139  | 139  |
| K, mEq/l     | 3.8  | 2.9  | 4.1  | 4    | 3.9  | 4    | 3.9  |
| Cl, mEq/l    | 102  | 103  | 103  | 102  | 102  | 104  | 101  |
| EF, %        | 63.1 |      |      |      |      |      | 57.4 |
| %FS, %       | 28.3 |      |      |      |      |      | 24.7 |
| LVDd, mm     | 54.3 |      |      |      |      |      | 45.2 |
| VC, ml       | 1180 |      |      |      |      |      | 1330 |
| %VC, %       | 31.5 |      |      |      |      |      | 34.7 |
| PCF, l/min   | 220  |      |      |      |      |      | 210  |

#### DMD 17 y

| Week                      | Pre  | 4    | 8    | 12   | 16   | 20   | 24   |
|---------------------------|------|------|------|------|------|------|------|
| WBC, ×10 <sup>3</sup> /μl | 5300 | 5000 | 5200 | 4300 | 4400 | 5000 | 4800 |
| Hb, mg/dl                 | 15.5 | 15   | 15   | 14.8 | 15.1 | 14.6 | 14.9 |
| Plt, ×10 <sup>3</sup> /μl | 353  | 352  | 249  | 30   | 352  | 324  | 335  |
| CK, unit/l                | 1098 | 1171 | 842  | 887  | 877  | 878  | 1396 |
| AST, unit/l               | 31   | 34   | 28   | 28   | 29   | 31   | 32   |
| ALT, unit/l               | 53   | 53   | 41   | 34   | 39   | 44   | 36   |
| LDH, unit/l               | 274  | 238  | 293  | 272  | 229  | 240  | 251  |
| γ-GTP, mg/dl              | 22   | 17   | 18   | 15   | 15   | 16   | 12   |
| T.Bil, mg/dl              | 0.6  | 1    | 0.6  | 1    | 0.9  | 0.8  | 0.8  |
| D.Bil, mg/dl              | 0.2  | 0.3  | 0.2  | 0.3  | 0.3  | 0.2  | 0.2  |
| BUN, mg/dl                | 10   | 11   | 11   | 10   | 10   | 8    | 10   |
| Cre, mg/dl                | 0.06 | 0.04 | 0.06 | 0.05 | 0.05 | 0.07 | 0.05 |
| Cys-C, mg/l               | 0.75 |      | 0.79 |      | 0.76 |      | 0.78 |
| TG, mg/dl                 | 115  | 59   | 75   | 86   | 75   | 88   | 63   |
| T.Cho, mg/dl              | 135  | 141  | 150  | 145  | 165  | 172  | 164  |
| Na, mEq/l                 | 140  | 142  | 143  | 140  | 140  | 142  | 144  |
| K, mEq/l                  | 4.4  | 4.1  | 3.9  | 4.1  | 4.3  | 3.7  | 4.1  |
| Cl, mEq/l                 | 102  | 106  | 105  | 103  | 103  | 104  | 107  |
| BNP, pg/ml                | <0.4 | 4    | <0.4 | 4.2  | 5.3  | 5.6  | 5.8  |
| EF, %                     | 44.7 |      |      |      |      |      | 42.7 |
| %FS, %                    | 18.0 |      |      |      |      |      | 16.7 |
| LVDd, mm                  | 50.8 |      |      |      |      |      | 49.8 |
| VC, ml                    | 680  |      |      |      |      |      | 600  |
| %VC, %                    | 16.3 |      |      |      |      |      | 14.4 |
| PCF, l/min                | 170  |      |      |      |      |      | 160  |

#### DMD 23 y

| Week                      | Pre  | 4    | 8    | 12   | 16   | 20   | 24   |
|---------------------------|------|------|------|------|------|------|------|
| WBC, x10 <sup>3</sup> /μl | 4600 | 5800 | 5300 | 4300 | 4400 | 4200 | 6000 |
| Hb, mg/dl                 | 16.1 | 14.1 | 14.6 | 14.9 | 15.1 | 14.7 | 15.3 |
| Plt, x10 <sup>3</sup> /μl | 248  | 367  | 239  | 209  | 250  | 307  | 226  |
| CK, unit/l                | 546  | 246  | 473  | 662  | 412  | 449  | 400  |
| AST, unit/l               | 38   | 20   | 48   | 41   | 34   | 33   | 32   |
| ALT, unit/l               | 40   | 27   | 51   | 43   | 3    | 34   | 29   |
| LDH, unit/l               | 203  | 246  | 184  | 202  | 228  | 186  | 201  |
| γ-GTP, mg/dl              | 32   | 37   | 40   | 26   | 34   | 45   | 30   |
| T.Bil, mg/dl              | 0.5  | 0.4  | 0.6  | 0.5  | 0.6  | 0.4  | 0.5  |
| D.Bil, mg/dl              | 0.1  | 0.1  | 0.1  | 0.1  | 0.1  | 0.1  | 0.1  |
| BUN, mg/dl                | 13   | 8    | 10   | 10   | 9    | 9    | 10   |
| Cre, mg/dl                | 0.06 | 0.06 | 0.07 | 0.04 | 0.07 | 0.06 | 0.07 |
| Cys-C, mg/l               | 0.77 |      | 0.82 |      | 0.74 |      | 0.68 |
| TG, mg/dl                 | 70   | 73   | 77   | 67   | 72   | 85   | 60   |
| T.Cho, mg/dl              | 146  | 127  | 161  | 157  | 158  | 155  | 148  |
| Na, mEq/l                 | 141  | 138  | 141  | 140  | 138  | 141  | 141  |
| K, mEq/l                  | 4.4  | 4.7  | 4.5  | 4.7  | 4.5  | 4.5  | 4.3  |
| Cl, mEq/l                 | 105  | 105  | 107  | 104  | 103  | 105  | 105  |
| BNP, pg/ml                | <0.4 | <0.4 | 6.8  | 4    | <0.4 | <0.4 | <0.4 |
| EF, %                     | 63.0 |      |      |      |      |      | NA   |
| %FS, %                    | 28.2 |      |      |      |      |      | NA   |
| LVDd, mm                  | 54.2 |      |      |      |      |      | NA   |
| VC, ml                    | 550  |      |      |      |      |      | 610  |
| %VC, %                    | 13.9 |      |      |      |      |      | 15.4 |
| PCF, l/min                | 90   |      |      |      |      |      | 100  |

#### DMD 39 y

| Week                      | Pre  | 4     | 8    | 12   | 16   | 20   | 24   |
|---------------------------|------|-------|------|------|------|------|------|
| WBC, x10 <sup>3</sup> /μl | 6900 | 10800 | 6700 | 6500 | 6800 | 7900 | 6800 |
| Hb, mg/dl                 | 15.6 | 14    | 14.9 | 13.8 | 14.5 | 15   | 13.6 |
| Plt, x10 <sup>3</sup> /μl | 277  | 280   | 302  | 286  | 280  | 285  | 336  |
| CK, unit/l                | 200  | 155   | 178  | 177  | 248  | 268  | 166  |
| AST, unit/l               | 30   | 25    | 31   | 26   | 36   | 31   | 34   |
| ALT, unit/l               | 36   | 33    | 39   | 36   | 41   | 38   | 46   |
| LDH, unit/l               | 178  | 195   | 168  | 140  | 209  | 180  | 163  |
| γ-GTP, mg/dl              | 33   | 28    | 29   | 28   | 28   | 31   | 37   |
| T.Bil, mg/dl              | 0.5  | 0.5   | 0.8  | 0.7  | 0.5  | 0.6  | 0.4  |
| D.Bil, mg/dl              | 0.1  | 0.1   | 0.2  | 0.2  | 0.1  | 0.2  | 0.1  |
| BUN, mg/dl                | 11   | 12    | 8    | 8    | 8    | 12   | 10   |
| Cre, mg/dl                | 0.06 | 0.04  | 0.04 | 0.03 | 0.02 | 0.04 | 0.06 |
| Cys-C, mg/l               | 0.75 |       | 0.74 |      | 0.74 |      | 0.69 |
| TG, mg/dl                 | 106  | 106   | 131  | 134  | 101  | 134  | 178  |
| T.Cho, mg/dl              | 138  | 136   | 170  | 147  | 161  | 172  | 163  |
| Na, mEq/l                 | 140  | 140   | 140  | 140  | 138  | 139  | 140  |
| K, mEq/l                  | 4.2  | 4.5   | 4    | 3.7  | 4.1  | 3.8  | 4.1  |
| Cl, mEq/l                 | 106  | 107   | 106  | 107  | 106  | 106  | 107  |
| BNP, pg/ml                | 17.3 | 23.7  | 16.3 | 17   | 15.8 | 17.7 | 15.7 |
| EF, %                     | 37.4 |       |      |      |      |      | 37.9 |

|            |      |      |
|------------|------|------|
| %FS, %     | 14.5 | 14.7 |
| LVDd, mm   | 58.0 | 55.8 |
| VC, ml     | NA   | NA   |
| %VC, %     | NA   | NA   |
| PCF, l/min | NA   | NA   |

### BMD 23 y

| Week                           | Pre   | 4    | 8    | 12   | 16   | 20   | 24    |
|--------------------------------|-------|------|------|------|------|------|-------|
| WBC, $\times 10^3/\mu\text{l}$ | 4400  | 6300 | 5600 | 3900 | 5000 | 5400 | 4800  |
| Hb, mg/dl                      | 14.8  | 14.2 | 14.5 | 14.3 | 14.8 | 14.7 | 14.1  |
| Plt, $\times 10^3/\mu\text{l}$ | 199   | 263  | 245  | 239  | 236  | 247  | 229   |
| CK, unit/l                     | 431   | 423  | 493  | 821  | 754  | 988  | 316   |
| AST, unit/l                    | 25    | 24   | 25   | 32   | 33   | 47   | 21    |
| ALT, unit/l                    | 19    | 24   | 17   | 19   | 27   | 29   | 16    |
| LDH, unit/l                    | 265   | 208  | 213  | 191  | 199  | 257  | 213   |
| $\gamma$ -GTP, mg/dl           | 14    | 17   | 18   | 16   | 16   | 15   | 17    |
| T.Bil, mg/dl                   | 0.8   | 0.9  | 0.5  | 0.6  | 0.7  | 0.6  | 0.8   |
| D.Bil, mg/dl                   | 0.2   | 0.3  | 0.1  | 0.1  | 0.2  | 0.2  | 0.2   |
| BUN, mg/dl                     | 12    | 10   | 12   | 12   | 9    | 9    | 9     |
| Cre, mg/dl                     | 0.43  | 0.43 | 0.52 | 0.43 | 0.44 | 0.47 | 0.43  |
| Cys-C, mg/l                    | 0.75  |      | 0.83 |      | 0.79 |      | 0.75  |
| TG, mg/dl                      | 50    | 54   | 82   | 66   | 66   | 71   | 48    |
| T.Cho, mg/dl                   | 146   | 145  | 154  | 151  | 161  | 167  | 135   |
| Na, mEq/l                      | 140   | 140  | 142  | 141  | 140  | 139  | 139   |
| K, mEq/l                       | 4.2   | 4    | 4    | 3.7  | 4    | 4.1  | 3.9   |
| Cl, mEq/l                      | 106   | 106  | 108  | 107  | 107  | 105  | 107   |
| BNP, pg/ml                     | 5.6   | 8.3  | 4.2  | 3.7  | 6    | 6.6  | 14.6  |
| EF, %                          | 75.9  |      |      |      |      |      | 77.4  |
| %FS, %                         | 37.8  |      |      |      |      |      | 39.2  |
| LVDd, mm                       | 53.3  |      |      |      |      |      | 54.9  |
| VC, ml                         | 4520  |      |      |      |      |      | 4620  |
| %VC, %                         | 103.2 |      |      |      |      |      | 104.1 |
| PCF, l/min                     | 500   |      |      |      |      |      | 520   |

### BMD 31 y

| Week                           | Pre  | 4    | 8    | 12   | 16   | 20   | 24   |
|--------------------------------|------|------|------|------|------|------|------|
| WBC, $\times 10^3/\mu\text{l}$ | 5900 | 5100 | 5100 | 4700 | 5200 | 5200 | 5400 |
| Hb, mg/dl                      | 15.9 | 14.4 | 15.4 | 14.8 | 15.2 | 15.3 | 15.3 |
| Plt, $\times 10^3/\mu\text{l}$ | 245  | 253  | 273  | 255  | 253  | 252  | 266  |
| CK, unit/l                     | 2401 | 949  | 988  | 423  | 902  | 721  | 714  |
| AST, unit/l                    | 61   | 39   | 37   | 24   | 32   | 32   | 32   |
| ALT, unit/l                    | 60   | 59   | 58   | 40   | 41   | 47   | 47   |
| LDH, unit/l                    | 246  | 232  | 290  | 191  | 221  | 215  | 241  |
| $\gamma$ -GTP, mg/dl           | 14   | 16   | 13   | 14   | 14   | 14   | 15   |
| T.Bil, mg/dl                   | 0.7  | 0.9  | 1    | 1.1  | 0.8  | 0.9  | 0.8  |
| D.Bil, mg/dl                   | 0.2  | 0.2  | 0.3  | 0.3  | 0.2  | 0.3  | 0.2  |
| BUN, mg/dl                     | 9    | 7    | 8    | 7    | 7    | 8    | 6    |
| Cre, mg/dl                     | 0.15 | 0.12 | 0.17 | 0.14 | 0.21 | 0.13 | 0.15 |

|              |      |     |      |     |     |     |       |
|--------------|------|-----|------|-----|-----|-----|-------|
| Cys-C, mg/l  | 0.71 |     | 0.77 |     | 0.8 |     | 0.74  |
| TG, mg/dl    | 83   | 98  | 113  | 99  | 128 | 103 | 151   |
| T.Cho, mg/dl | 143  | 163 | 153  | 171 | 156 | 166 | 167   |
| Na, mEq/l    | 143  | 140 | 142  | 142 | 145 | 141 | 143   |
| K, mEq/l     | 3.6  | 4.1 | 3.5  | 4.2 | 3.5 | 3.9 | 3.8   |
| Cl, mEq/l    | 106  | 106 | 107  | 106 | 108 | 105 | 107   |
| BNP, pg/ml   | 12.3 | 5   | 4.3  | 6.1 | 15  | 9.3 | 7     |
| EF, %        | 68.4 |     |      |     |     |     | 64.0  |
| %FS, %       | 31.9 |     |      |     |     |     | 28.8  |
| LVDd, mm     | 48.8 |     |      |     |     |     | 53.2  |
| VC, ml       | 4180 |     |      |     |     |     | 4310  |
| %VC, %       | 99.5 |     |      |     |     |     | 102.6 |
| PCF, l/min   | 470  |     |      |     |     |     | 430   |

#### BMD 34 y

| Week                           | Pre  | 4    | 8    | 12   | 16   | 20   | 24   |
|--------------------------------|------|------|------|------|------|------|------|
| WBC, $\times 10^3/\mu\text{l}$ | 4100 | 3500 | 5400 | 3300 | 4100 | 4500 | 5700 |
| Hb, mg/dl                      | 16.7 | 16.1 | 16.2 | 16   | 15.6 | 16.5 | 15.7 |
| Plt, $\times 10^3/\mu\text{l}$ | 250  | 254  | 258  | 223  | 271  | 252  | 233  |
| CK, unit/l                     | 2807 | 1951 | 1641 | 1850 | 2099 | 1982 | 2228 |
| AST, unit/l                    | 91   | 62   | 57   | 68   | 65   | 68   | 70   |
| ALT, unit/l                    | 122  | 116  | 93   | 113  | 84   | 102  | 115  |
| LDH, unit/l                    | 414  | 403  | 369  | 359  | 328  | 373  | 483  |
| $\gamma$ -GTP, mg/dl           | 23   | 24   | 23   | 29   | 24   | 25   | 20   |
| T.Bil, mg/dl                   | 0.7  | 0.8  | 0.5  | 0.6  | 0.5  | 0.6  | 0.7  |
| D.Bil, mg/dl                   | 0.1  | 0.2  | 0.1  | 0.1  | 0.1  | 0.1  | 0.2  |
| BUN, mg/dl                     | 16   | 10   | 12   | 10   | 11   | 15   | 9    |
| Cre, mg/dl                     | 0.39 | 0.4  | 0.39 | 0.39 | 0.42 | 0.57 | 0.43 |
| Cys-C, mg/l                    | 0.71 |      | 0.73 |      | 0.75 |      | 0.74 |
| TG, mg/dl                      | 122  | 136  | 182  | 184  | 293  | 204  | 157  |
| T.Cho, mg/dl                   | 151  | 161  | 167  | 168  | 164  | 179  | 150  |
| Na, mEq/l                      | 139  | 137  | 139  | 141  | 138  | 140  | 140  |
| K, mEq/l                       | 4.1  | 4    | 4.2  | 4.1  | 4.3  | 4.3  | 4    |
| Cl, mEq/l                      | 102  | 103  | 105  | 103  | 103  | 104  | 105  |
| BNP, pg/ml                     | <4.0 | <4.0 | <4.0 | 6.3  | 4.6  | <4.0 | <4.0 |
| EF, %                          | 68.3 |      |      |      |      |      | 58.4 |
| %FS, %                         | 31.9 |      |      |      |      |      | 25.3 |
| LVDd, mm                       | 51.0 |      |      |      |      |      | 52.6 |
| VC, ml                         | 3070 |      |      |      |      |      | 3160 |
| %VC, %                         | 73.6 |      |      |      |      |      | 77.2 |
| PCF, l/min                     | 525  |      |      |      |      |      | 620  |

#### BMD 46 y

| Week                           | Pre  | 4    | 8    | 12   | 16   | 20   | 24   |
|--------------------------------|------|------|------|------|------|------|------|
| WBC, $\times 10^3/\mu\text{l}$ | 4800 | 3800 | 4000 | 4000 | 4500 | 4500 | 3700 |
| Hb, mg/dl                      | 17.4 | 16.7 | 16.4 | 16.1 | 16.4 | 16.6 | 16.5 |
| Plt, $\times 10^3/\mu\text{l}$ | 192  | 131  | 207  | 213  | 229  | 212  | 206  |
| CK, unit/l                     | 766  | 946  | 937  | 822  | 582  | 405  | 660  |



|              |      |      |      |      |      |      |      |
|--------------|------|------|------|------|------|------|------|
| AST, unit/l  | 44   | 47   | 39   | 46   | 36   | 34   | 41   |
| ALT, unit/l  | 111  | 112  | 87   | 98   | 82   | 87   | 97   |
| LDH, unit/l  | 351  | 294  | 300  | 308  | 262  | 262  | 255  |
| γ-GTP, mg/dl | 64   | 49   | 44   | 43   | 52   | 49   | 49   |
| T.Bil, mg/dl | 0.6  | 0.8  | 0.8  | 0.7  | 0.7  | 0.7  | 0.7  |
| D.Bil, mg/dl | 0.1  | 0.2  | 0.2  | 0.1  | 0.1  | 0.1  | 0.1  |
| BUN, mg/dl   | 10   | 8    | 9    | 10   | 12   | 10   | 9    |
| Cre, mg/dl   | 0.25 | 0.28 | 0.28 | 0.25 | 0.27 | 0.3  | 0.28 |
| Cys-C, mg/l  | 0.7  |      | 0.66 |      | 0.78 |      | 0.75 |
| TG, mg/dl    | 268  | 263  | 360  | 326  | 371  | 327  | 278  |
| T.Cho, mg/dl | 239  | 230  | 223  | 221  | 246  | 248  | 222  |
| Na, mEq/l    | 141  | 141  | 143  | 141  | 143  | 141  | 142  |
| K, mEq/l     | 4.4  | 4.2  | 4.2  | 4.2  | 4.3  | 4.3  | 4.1  |
| Cl, mEq/l    | 106  | 106  | 106  | 106  | 106  | 105  | 104  |
| BNP, pg/ml   | 5.9  | <4.0 | <4.0 | <4.0 | <4.0 | <4.0 | <4.0 |
| EF, %        | 75.8 |      |      |      |      |      | 83.4 |
| %FS, %       | 37.7 |      |      |      |      |      | 45.1 |
| LVDd, mm     | 41.9 |      |      |      |      |      | 42.4 |
| VC, ml       | 3070 |      |      |      |      |      | 2860 |
| %VC, %       | 83.4 |      |      |      |      |      | 79.4 |
| PCF, l/min   | 450  |      |      |      |      |      | 730  |

#### FCMD 12 y

| Week                      | Pre  | 4    | 8    | 12   | 16   | 20   | 24   |
|---------------------------|------|------|------|------|------|------|------|
| WBC, ×10 <sup>3</sup> /μl | 5000 | 5300 | 5600 | 6000 | 7100 | 7400 | 4900 |
| Hb, mg/dl                 | 13.9 | 13.2 | 13.4 | 13   | 13.2 | 13   | 14   |
| Plt, ×10 <sup>3</sup> /μl | 299  | 355  | 263  | 271  | 355  | 308  | 286  |
| CK, unit/l                | 840  | 601  | 576  | 808  | 580  | 842  | 781  |
| AST, unit/l               | 25   | 21   | 22   | 27   | 19   | 25   | 28   |
| ALT, unit/l               | 18   | 14   | 15   | 19   | 14   | 17   | 23   |
| LDH, unit/l               | 289  | 221  | 254  | 265  | 201  | 238  | 259  |
| γ-GTP, mg/dl              | 12   | 12   | 13   | 17   | 16   | 14   | 17   |
| T.Bil, mg/dl              | 0.3  | 0.3  | 0.4  | 0.4  | 0.3  | 0.4  | 0.4  |
| D.Bil, mg/dl              | 0.1  | 0    | 0.1  | 0.1  | 0.1  | 0.1  | 0.1  |
| BUN, mg/dl                | 4    | 4    | 5    | 7    | 6    | 6    | 7    |
| Cre, mg/dl                | 0.04 | 0.03 | 0.05 | 0.07 | 0.04 | 0.07 | 0.04 |
| Cys-C, mg/l               | 0.67 |      | 0.66 |      | 0.61 |      | 0.71 |
| TG, mg/dl                 | 95   | 137  | 105  | 88   | 59   | 85   | 63   |
| T.Cho, mg/dl              | 175  | 173  | 169  | 170  | 157  | 182  | 189  |
| Na, mEq/l                 | 141  | 141  | 140  | 140  | 140  | 139  | 140  |
| K, mEq/l                  | 4.4  | 4    | 4.3  | 4    | 4.3  | 4.4  | 4.3  |
| Cl, mEq/l                 | 105  | 107  | 105  | 105  | 104  | 104  | 105  |
| BNP, pg/ml                | 9.5  | 6.3  | 6.4  | <4.0 | 5.5  | <4.0 | 11   |
| EF, %                     | 72.2 |      |      |      |      |      | 70.3 |
| %FS, %                    | 34.7 |      |      |      |      |      | 33.3 |
| LVDd, mm                  | 40.3 |      |      |      |      |      | 40.6 |
| VC, ml                    | 610  |      |      |      |      |      | 640  |
| %VC, %                    | 37.9 |      |      |      |      |      | 32.0 |
| PCF, l/min                | 125  |      |      |      |      |      | 145  |

**FCMD 17 y**

| Week                           | Pre  | 4    | 8    | 12   | 16   | 20   | 24   |
|--------------------------------|------|------|------|------|------|------|------|
| WBC, $\times 10^3/\mu\text{l}$ | 3800 | 4100 | 4400 | 3800 | 3500 | 3400 | 3300 |
| Hb, mg/dl                      | 15.3 | 14.6 | 15.3 | 15.2 | 15   | 14.8 | 14.3 |
| Plt, $\times 10^3/\mu\text{l}$ | 248  | 407  | 309  | 250  | 199  | 243  | 238  |
| CK, unit/l                     | 1981 | 1120 | 1295 | 1220 | 1177 | 888  | 902  |
| AST, unit/l                    | 32   | 25   | 27   | 29   | 27   | 27   | 27   |
| ALT, unit/l                    | 15   | 17   | 14   | 14   | 16   | 14   | 15   |
| LDH, unit/l                    | 367  | 326  | 309  | 296  | 285  | 282  | 283  |
| $\gamma$ -GTP, mg/dl           | 13   | 17   | 12   | 10   | 9    | 9    | 11   |
| T.Bil, mg/dl                   | 0.5  | 0.5  | 0.5  | 0.5  | 0.6  | 0.7  | 0.8  |
| D.Bil, mg/dl                   | 0    | 0.1  | 0.1  | 0.1  | 0.2  | 0.2  | 0.2  |
| BUN, mg/dl                     | 11   | 11   | 9    | 7    | 13   | 9    | 12   |
| Cre, mg/dl                     | 0.05 | 0.06 | 0.08 | 0.04 | 0.05 | 0.05 | 0.05 |
| Cys-C, mg/l                    | 0.71 |      | 0.71 |      | 0.65 |      | 0.63 |
| TG, mg/dl                      | 69   | 103  | 67   | 34   | 40   | 49   | 51   |
| T.Cho, mg/dl                   | 205  | 217  | 213  | 219  | 217  | 224  | 22   |
| Na, mEq/l                      | 142  | 145  | 141  | 141  | 142  | 141  | 141  |
| K, mEq/l                       | 4.5  | 4.6  | 4    | 4.4  | 4.1  | 4.3  | 4.2  |
| Cl, mEq/l                      | 106  | 104  | 106  | 104  | 104  | 103  | 105  |
| BNP, pg/ml                     | 7.6  | 7.1  | 6.1  | 6.4  | 4.7  | 4.2  | 6    |
| EF, %                          | 70.5 |      |      |      |      |      | 61.0 |
| %FS, %                         | 33.3 |      |      |      |      |      | 26.9 |
| LVDd, mm                       | 36.6 |      |      |      |      |      | 36.0 |
| VC, ml                         | 1000 |      |      |      |      |      | 940  |
| %VC, %                         | 27.4 |      |      |      |      |      | 25.8 |
| PCF, l/min                     | 230  |      |      |      |      |      | 170  |
